# Supplementary material for: A report on arsenic removal from water via adsorption of an arsenomolybdate complex on S–CuFe2O4 adsorbents
Source: Royal Society of Chemistry journal article supplement (doi:10.1039/d4ew00300d), 2024-01-01
Supplement: d4ew00300d1.pdf [file d4ew00300d1.pdf]

## Electronic Supplementary Information

### **A report on arsenic removal from water via adsorption of arsenomolybdate complex on S-CuFe<sub>2</sub>O<sub>4</sub> adsorbents†**

Ejaz Hussain<sup>a\*</sup>, Maryam Sultana<sup>a</sup>, Muhammad Zeeshan Abid<sup>a</sup>, Aqsa Khan Buzdar<sup>a</sup>, Hamdy Khamees Thabet<sup>b</sup>, Salah M. El-Bahy<sup>c</sup>, Muhammad Jalil<sup>a</sup>, Abdul Rauf<sup>a</sup>, Zeinhom M. El-Bahy<sup>d</sup>, Khezina Rafiq<sup>a\*</sup>

<sup>a</sup>Institute of Chemistry, Inorganic Materials Laboratory 52S, The Islamia University of Bahawalpur-63100, Pakistan.

<sup>b</sup>Department of Chemistry, College of Sciences and Arts, Northern Border University, Rafha-91911, Saudi Arabia.

<sup>c</sup>Department of Chemistry, Turabah University College, Taif University, P.O. Box 11099, Taif-21944, Saudi Arabia.

<sup>d</sup>Department of Chemistry, Faculty of Science, Al-Azhar University, Nasr City-11884, Cairo, Egypt.

Corresponding authors email: [ejaz.hussain@iub.edu.pk](mailto:ejaz.hussain@iub.edu.pk); [khezina.rafiq@iub.edu.pk](mailto:khezina.rafiq@iub.edu.pk)

## Section I

### List of Abbreviations

AMC = Arsenomolybdate complex

Emu/g = Electromagnetic unit

As<sup>+3</sup> = Arsenic (III)

As<sup>+5</sup> = Arsenic (IV)

K<sub>L</sub> = Langmuir model

K<sub>F</sub> = Freundlich model

K<sub>T</sub> = Temkin model

K<sub>d</sub> = Intra-particle diffusion

K<sub>1</sub> = Pseudo-first order reaction

K<sub>2</sub> = Pseudo-second order reaction

LA = Layyah

### Conformation through arsenic Quick™ kit:

The reaction bottles were filled with the water sample (treated with adsorbent) up to the marked line. The first chemical labeled as level 3 pink teaspoons (in the kit box) was then added to reaction bottles. The reaction bottles were then tightly closed and shaken for 10 seconds to allow the material to settle down to overcome the sulfide interference. Then, the reaction bottles were filled with three level white teaspoons of chemical no.3 zinc mesh and were sealed tightly and vigorously shaken for approximately five seconds. After then, the arsenic test strip was precisely fitted into the turret, so that the red line imprinted on the strip was placed behind the reaction bottles. The yellow cape has been removed and replaced with a white cap that contains an arsenic testing strip inside. During the experiment stopwatch was used to monitor the changes during the process. The reaction was completed in around ten minutes and the white strip was carefully removed and the color that appeared matched exactly with the Quick™ Easy Read™ color chart. In order to identify the treated solution and to measure the quantity of the residual arsenic, a test strip and a standard chart from an arsenic kit was used. The results were then observed and recorded carefully.

## Section II

Chemical equation for AMC:

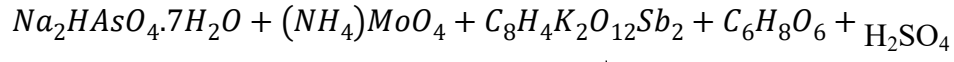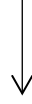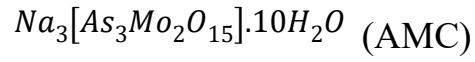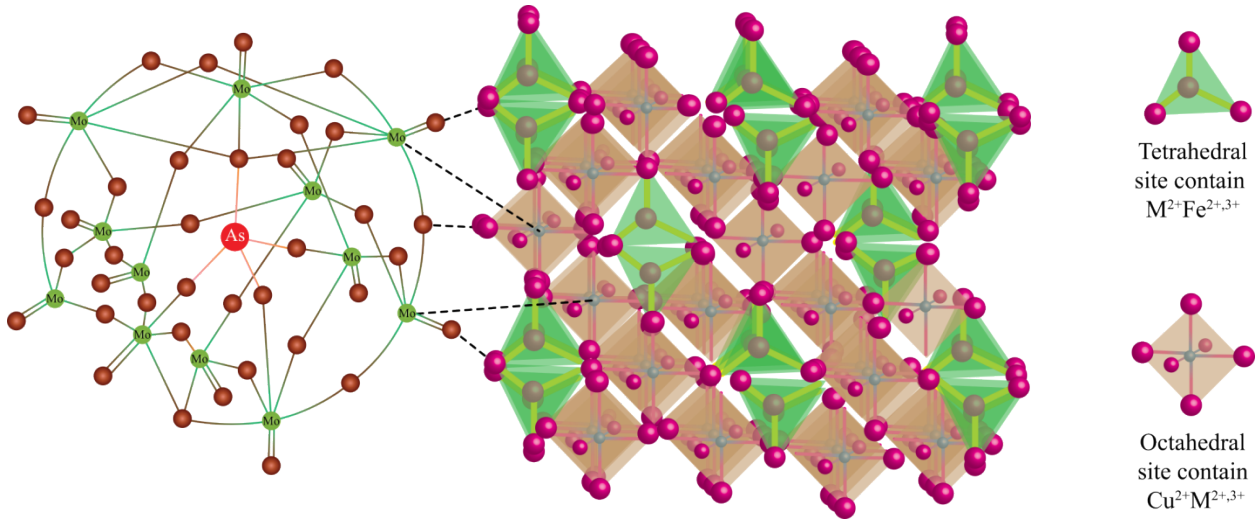

**Figure S1:** Structure of arsenomolybdate blue complex adsorbed on  $\text{CuFe}_2\text{O}_4$ .

**Table S1:** The adsorption parameters used during the removal of arsenic from solution

| Parameters to be optimized | Fixed parameters |                   |      |                     |                                      | Variables parameters | Optimum |
|----------------------------|------------------|-------------------|------|---------------------|--------------------------------------|----------------------|---------|
|                            | Temp (°C)        | Contact time(min) | pH   | Adsorbent dose (mg) | Initial Arsenic concentration (mg/L) |                      |         |
| Solution pH                | 25               | 30                | ---- | 50                  | 10                                   | 3 to 9               | 6.5     |
| Temperature (°C)           | ----             | 30                | 6.5  | 50                  | 10                                   | 20–60 °C             | 35 °C   |
| Contact time (min)         | 35               | ----              | 6.5  | 50                  | 10                                   | 1–30 min             | 20 min  |
| Concentration (mg/L)       | 35               | 20                | 6.5  | 50                  | ---                                  | 1–20 ppm             | 10 ppm  |
| Adsorption dose (mg)       | 35               | 20                | 6.5  | ---                 | 10                                   | 10–70 mg             | 55 mg   |

### Section III

#### $\lambda$ -max Determination of Arsenomolybdate Blue complex:

Ultraviolet (UV) spectrophotometer was initially switched on, then after five minutes, a wavelength of 400 nm was set as the initial wavelength. Distilled water was then used for calibrating the instrument. Sample solution was then placed in a UV spectrophotometer, and initial wavelength was calculated. The absorbance has been determined by maintaining a difference of 10 nm at regular intervals. The absorbance started to rise until it reached a certain limit, at which it began to drop. Lambda max ( $\lambda$ ) values for the 10 ppm solution were obtained by plotting a graph of absorbance (A) against time (t), which was obtained from all absorbance measurements completed up to this point at regular intervals. Because of the different concentration of  $As^{+5}$  in the solution, the process was applied to each sample which included the untreated complex, and the absorbance value fluctuated throughout the process. Maximum absorbance value measured at 850 nm is about 0.825. Figure.6 (b) represents the  $\lambda$ -max of AMC.

**Table S2:** Kinetic parameters: Pseudo-first order, pseudo-second-order, Liquid film diffusion model and intra-particle diffusion model, Isotherm parameters for the Langmuir, Freundlich and Temkin model.

| Kinetic models                 | Parameters                                               |                          |                 |
|--------------------------------|----------------------------------------------------------|--------------------------|-----------------|
| Pseudo-first order             | $K_1 = 6.5 \times 10^{-3}$                               | $q_e$ (mg/g)<br>= 1.2893 | $R^2=0.76418$   |
| Pseudo-Second order            | $K_2 \left( \frac{g}{mg} \right) = 2.294 \times 10^{-5}$ | $q_e$ (mg/g)<br>= 180.83 | $R^2 = 0.99997$ |
| Intra-Particle diffusion       | $K_d$ (mg/gh) = 90.905                                   | ----                     | $R^2 = 0.69763$ |
| Liquid-film diffusion          | $K_F = 1.0243$                                           | -----                    | $R^2 = 0.65103$ |
| Langmuir                       | $K_L \left( \frac{L}{mg} \right) = 0.000311$             | $q_{max} = 381.679$      | $R^2 = 0.97021$ |
| Freundlich                     | $K_F \left( \frac{mg}{g} \right) = 512.125$              | $1/n = 0.2218$           | $R^2 = 0.9058$  |
| Temkin(mg/gh <sup>-0.5</sup> ) | $K_T \left( \frac{L}{mg} \right) = 5606.76$              | -----                    | $R^2 = 0.87431$ |

**Table S3:** EDX analysis weight and amount percentage of element in as-synthesized adsorbent S-CuFe<sub>2</sub>O<sub>4</sub>.

| Elements | Wt.% | At. % |
|----------|------|-------|
| S        | 2.51 | 2.63  |
| O        | 25.8 | 54.6  |
| C        | 0.60 | 1.68  |
| Cu       | 24.2 | 12.38 |
| Fe       | 46.8 | 28.26 |
| Total    | 100  | 100   |

**Table S4:** Comparison of Freundlich, Langmuir and Temkin models parameters with reported adsorbent.

| Sr.No | Adsorbent                                                                                        | K <sub>F</sub><br>(L.mg <sup>-1</sup> ) | K <sub>L</sub> (mg.g <sup>-1</sup> ) | K <sub>T</sub> (L.mg <sup>-1</sup> ) | Ref.      |
|-------|--------------------------------------------------------------------------------------------------|-----------------------------------------|--------------------------------------|--------------------------------------|-----------|
| 1     | GNPs/CuFe <sub>2</sub> O <sub>4</sub>                                                            | 10.31                                   | 0.02                                 | ---                                  | 1         |
| 2     | Pb(II)/NiFe <sub>2</sub> O <sub>4</sub>                                                          | 48.8                                    | 0.1878                               | 1.19                                 | 2         |
| 3     | As(V)/0.8Ni <sub>0.5</sub> Zn <sub>0.5</sub> Fe <sub>2</sub> O <sub>4</sub> /0.2SiO <sub>2</sub> | 98.3787                                 | 114.6789                             | 5.5601                               | 3         |
| 4     | Porous copper ferrite foam                                                                       | 29.28                                   | 0.32                                 | ----                                 | 4         |
| 5     | Graphene oxide/CuFe <sub>2</sub> O <sub>4</sub> foam                                             | 16.49                                   | 0.046                                | ----                                 | 5         |
| 6     | Cobalt ferrite nanoparticles                                                                     | 175.56                                  | ----                                 | -----                                | 6         |
| 7     | S-CuFe <sub>2</sub> O <sub>4</sub>                                                               | 512.125                                 | 0.000311                             | 5606.76                              | This work |

**Table S5:** Comparison for adsorption capacities of  $\text{CuFe}_2\text{O}_4$  and  $\text{S-CuFe}_2\text{O}_4$ .

| Adsorbent                                   | pH  | Adsorption capacity of $\text{As}^{3+}$<br>(mg/g) | Adsorption capacity of $\text{As}^{5+}$<br>(mg/g) | Ref.      |
|---------------------------------------------|-----|---------------------------------------------------|---------------------------------------------------|-----------|
| $\text{CuFe}_2\text{O}_4$ binary oxide      | 7   | 122.3                                             | 82.7                                              | 7         |
| GNPs/Fe-Mg oxide                            | 7   | 103.9                                             | 103.9                                             | 1         |
| $\text{FeMn}_x/\text{RGO}$                  | 7   | 13.1                                              | 5.83                                              | 8         |
| $\text{Mg}_{0.27}\text{Fe}_{2.5}\text{O}_4$ | 5.2 | 127.4                                             | 83.2                                              | 9         |
| $\text{Fe}_2\text{O}_4/\text{MnO}_2$        | 6.2 | 2.89                                              | 3.84                                              | 10        |
| $\text{MnFe}_2\text{O}_4$ NCs               | --- | 27.27                                             | -----                                             | 11        |
| $\text{CuFe}_2\text{O}_4$ (Powder)          | 7.3 | 41.2                                              | -----                                             | 12        |
| $\text{CuFe}_2\text{O}_4$ (Foam)            | 6.5 | 44.0                                              | 85.4                                              | 5         |
| $\text{MnFe}_2\text{O}_4$ (Powder)          | 7.5 | 94                                                | 90                                                | 13        |
| $\text{CuFe}_2\text{O}_4$                   | 6.5 | 140.21                                            | 140.21                                            | This work |
| $\text{S-CuFe}_2\text{O}_4$                 | 6.5 | 181.81                                            | 181.81                                            | This work |

**Table S6:** Parameters of VSM.

| Adsorbent                   | $H_c$ (Oe) | $M_s$ ( $\text{emu g}^{-1}$ ) | $M_r$ ( $\text{emu g}^{-1}$ ) | $S$ ( $M_r/M_s$ ) |
|-----------------------------|------------|-------------------------------|-------------------------------|-------------------|
| $\text{CuFe}_2\text{O}_4$   | 191.51     | 60.8                          | 12.30                         | 0.2023            |
| $\text{S-CuFe}_2\text{O}_4$ | 314.63     | 69.35                         | 15.91                         | 0.2294            |

## Section IV

### Sampling from field:

For the purpose of estimating and eliminating the total arsenic, 50 water samples from various areas of District Layyah were collected. According to the survey, water obtained from hand pumps has slightly higher concentration of arsenic contents as compared to water collected from other sources such as tube well, motors etc. The average arsenic concentration in ground drinking water of District Layyah measured was 176.38 ppb (i.e. higher the limit set by World Health Organization recommendations). The survey results indicated that the community having high levels of arsenic in drinking water have been affected from various arsenical disorders. The arsenic level in ground drinking water of the affected areas was carefully examined by our team members. To remove arsenic from contaminated water, 1g of synthesized S-CuFe<sub>2</sub>O<sub>4</sub> adsorbent was used under nominal conditions. In District Layyah, where the average level of arsenic in water was 176.38 ppb, 1 g of as-synthesized adsorbent can give up to 272.4 gals of arsenic free-water. The maximum adsorption capacity of the aforementioned adsorbent measured was 181.81mg/g.



## Section V

### Protonation of AMC:

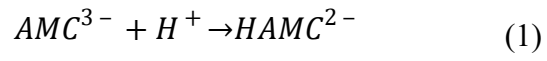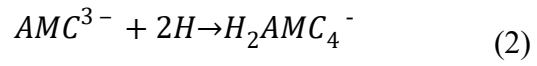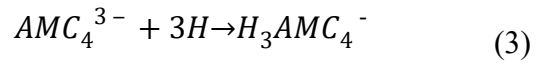

### Arsenate (AMC) absorption:

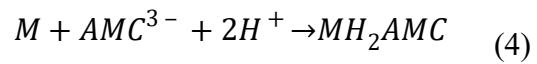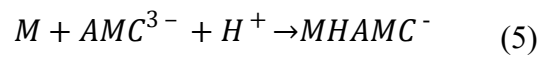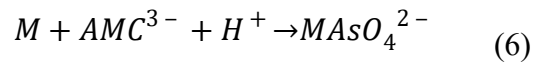

**Table S7:** Arsenic elimination from the ground drinking water of District Layyah using 1 g of S-CuFe<sub>2</sub>O<sub>4</sub> adsorbent

| Sample Code | Location             | Source     | Source depth | As in (ppb) | Abs* AMC | Abs** AMC | As Quick™ Tests | GPS (Meterk/Handheld-ZL-180) |               |      |
|-------------|----------------------|------------|--------------|-------------|----------|-----------|-----------------|------------------------------|---------------|------|
|             |                      |            |              |             |          |           |                 | E°                           | N             | Ele. |
| LA-1        | Kharal azeem         | Hand pump  | 80           | 250         | 0.160    | 0.000     | 0               | 70°56'23.6720                | 30°57'53.1000 | 147m |
| LA-2        | Khan wala            | Tube well  | 200          | 100         | 0.070    | 0.000     | 0               | 70°56'23.6630                | 30°57'53.800  | 125  |
| LA-3        | Hafiz abad           | Motor pump | 160          | 110         | 0.090    | 0.000     | 0               | 70°56'23.6690                | 30°57'53.830  | 122  |
| LA-4        | Shah jamal           | Hand pump  | 95           | 280         | 0.170    | 0.000     | 0               | 70°56'23.6698                | 30°57'53.840  | 133  |
| LA-5        | Jaman shah           | Hand pump  | 90           | 200         | 0.140    | 0.000     | 0               | 70°56'23.6710                | 30°57'53.855  | 124  |
| LA-6        | Jaisal               | Motor pump | 150          | 160         | 0.130    | 0.000     | 0               | 70°56'23.6730                | 30°57'53.850  | 135  |
| LA-7        | Shah sultan          | Hand pump  | 60           | 180         | 0.120    | 0.000     | 0               | 70°56'23.6750                | 30°57'53.855  | 126  |
| LA-8        | Wanjhery wala        | Hand pump  | 70           | 300         | 0.180    | 0.000     | 0               | 70°56'23.6780                | 30°57'53.860  | 137  |
| LA-9        | Hazar shah wala      | Motor pump | 150          | 130         | 0.090    | 0.000     | 0               | 70°56'23.6790                | 30°57'53.865  | 142  |
| LA-10       | Dasti wala           | Hand pump  | 80           | 190         | 0.150    | 0.000     | 0               | 70°56'23.6795                | 30°57'53.870  | 133  |
| LA-11       | Basti malwana        | Hand pump  | 75           | 240         | 0.145    | 0.000     | 0               | 70°56'23.6830                | 30°57'53.875  | 127  |
| LA-12       | Noor abad            | Tube well  | 300          | 150         | 0.135    | 0.002     | 0-3             | 70°56'23.6850                | 30°57'53.880  | 135  |
| LA-13       | Mohalla arifabad     | Hand pump  | 60           | 100         | 0.070    | 0.000     | 0               | 70°56'23.6870                | 30°57'53.889  | 136  |
| LA-14       | Faqirwala            | Tube well  | 350          | 105         | 0.060    | 0.003     | 0-4             | 70°56'23.6890                | 30°57'53.890  | 127  |
| LA-15       | Noon wala            | Hand pump  | 70           | 120         | 0.101    | 0.000     | 0               | 70°56'23.6940                | 30°57'53.895  | 115  |
| LA-16       | Mohalla faizabad     | Hand pump  | 90           | 110         | 0.650    | 0.000     | 0               | 70°56'23.6950                | 30°57'53.900  | 120  |
| LA-17       | Basti machi          | Tube well  | 350          | 80          | 0.050    | 0.003     | 0-4             | 70°56'23.6960                | 30°57'53.910  | 127  |
| LA-18       | Paki sagwan wali     | Hand pump  | 60           | 190         | 0.135    | 0.000     | 0               | 70°56'23.6970                | 30°57'53.925  | 119  |
| LA-19       | Basti wasava shumali | Tube well  | 200          | 80          | 0.050    | 0.000     | 0               | 70°56'23.6980                | 30°57'53.930  | 120  |
| LA-20       | Basti sawan wala     | Hand pump  | 80           | 145         | 0.0135   | 0.000     | 0               | 70°56'23.6990                | 30°57'53.935  | 133  |

|       |                      |            |       |     |        |       |     |               |              |     |
|-------|----------------------|------------|-------|-----|--------|-------|-----|---------------|--------------|-----|
| LA-21 | Dajal wala           | Tubewell   | 200   | 140 | 0.350  | 0.000 | 0   | 70°56'23.6995 | 30°57'53.940 | 131 |
| LA-22 | Mohalla bilal nagger | Tube well  | 280   | 150 | 0.505  | 0.001 | 0-2 | 70°56'23.6999 | 30°57'53.945 | 125 |
| LA-23 | Marnay shah          | Hand pump  | 80    | 100 | 0.070  | 0.000 | 0   | 70°56'23.6998 | 30°57'53.950 | 129 |
| LA-24 | Tibbi Maharan        | Tube well  | 300   | 130 | 0.130  | 0.000 | 0   | 70°56'23.7156 | 30°57'53.955 | 130 |
| LA-25 | Litti wala           | Hand pump  | 80    | 180 | 0.160  | 0.000 | 0   | 70°56'23.7169 | 30°57'53.955 | 128 |
| LA-26 | Basti Deen pur       | Hand pump  | 90    | 250 | 0.170  | 0.000 | 0   | 70°56'23.7173 | 30°57'53.956 | 130 |
| LA-27 | Mahi wala            | Tube well  | 300   | 140 | 0.131  | 0.000 | 0   | 70°56'23.7174 | 30°57'53.960 | 132 |
| LA-28 | Gujie kot sultan     | Tube well  | 200   | 110 | 0.070  | 0.000 | 0   | 70°56'23.7176 | 30°57'53.965 | 134 |
| LA-29 | Riaz abad            | Hand pump  | 95    | 180 | 0.160  | 0.000 | 0   | 70°56'23.7179 | 30°57'53.970 | 144 |
| LA-30 | Norang wala          | Hand pump  | 75    | 200 | 0.140  | 0.000 | 0   | 70°56'23.7135 | 30°57'53.975 | 110 |
| LA-31 | Mangla               | Hand pump  | 80    | 280 | 0.170  | 0.001 | 0-2 | 70°56'23.7138 | 30°57'53.980 | 115 |
| LA-32 | Shahadat wala        | Tube well  | 200   | 180 | 0.160  | 0.000 | 0   | 70°56'23.7139 | 30°57'53.985 | 124 |
| LA-33 | Yousaf wala          | Hand pump  | 60    | 300 | 0.190  | 0.002 | 0-3 | 70°56'23.7235 | 30°57'53.990 | 135 |
| LA-34 | Rehman abad          | Tube well  | 160   | 105 | 0.060  | 0.000 | 0   | 70°56'23.7236 | 30°57'53.940 | 138 |
| LA-35 | Basti shah nawaz     | Hand pump  | 50    | 170 | 0.120  | 0.000 | 0   | 70°56'23.7245 | 30°57'53.899 | 137 |
| LA-36 | Tahli wala           | Hand pump  | 75    | 280 | 0.170  | 0.001 | 0-2 | 70°56'23.7255 | 30°57'53.934 | 144 |
| LA-37 | Indus river          | River      | ----  | 210 |        | 0.000 | 0   | 70°56'23.7256 | 30°57'53.980 | 135 |
| LA-38 | Mochi wala           | Hand pump  | 60    | 300 | 0.190  | 0.002 | 0-3 | 70°56'23.7258 | 30°57'53.910 | 129 |
| LA-39 | Bypass               | Motor pump | 110   | 190 | 0.1850 | 0.000 | 0   | 70°56'23.7259 | 30°57'53.888 | 138 |
| LA-40 | Chandran             | Hand pump  | 70    | 200 | 0.140  | 0.000 | 0   | 70°56'23.7266 | 30°57'53.899 | 139 |
| LA-41 | Layyah minor         | Motor pump | 105   | 180 | 0.160  | 0.000 | 0   | 70°56'23.7277 | 30°57'53.850 | 130 |
| LA-42 | Railway              | Hand pump  | 65    | 200 | 0.140  | 0.000 | 0   | 70°56'23.7379 | 30°57'53.890 | 142 |
| LA-43 | THQ kot sultan       | Motor pump | 130   | 80  | 0.050  | 0.000 | 0   | 70°56'23.7480 | 30°57'53.870 | 141 |
| LA-44 | Pull Angra Road      | Canal      | ----- | 180 |        | 0.000 | 0   | 70°56'23.7499 | 30°57'53.976 | 143 |
| LA-45 | Basti arain          | Hand pump  | 80    | 170 | 0.140  | 0.000 | 0   | 70°56'23.7550 | 30°57'53.889 | 145 |

|       |                       |            |     |     |       |       |     |               |               |     |
|-------|-----------------------|------------|-----|-----|-------|-------|-----|---------------|---------------|-----|
| LA-46 | Phar pur              | Hand pump  | 70  | 160 | 0.120 | 0.000 | 0   | 70°56'23.7570 | 30°57'53.990  | 140 |
| LA-47 | Mohalla mohsin abad   | Motor pump | 120 | 200 | 0.140 | 0.000 | 0   | 70°56'23.7589 | 30°57'53.988  | 139 |
| LA-48 | Layyah minor          | Hand pump  | 60  | 300 | 0.190 | 0.002 | 0-3 | 70°56'23.7599 | 30°57'53.1000 | 137 |
| LA-49 | Ada ijaz abad         | Hand pump  | 80  | 280 | 0.170 | 0.001 | 0-2 | 70°56'23.7619 | 30°57'53.999  | 147 |
| LA-50 | Thal chowk/bail chowk | Hand pump  | 70  | 260 | 0.150 | 0.000 | 0   | 70°56'23.7624 | 30°57'53.990  | 143 |

**Table S8:** Survey results and reports obtained from District Layyah (Punjab. Pakistan)

| Survey month | Samples* |              | Survey location |            |            |            |              |
|--------------|----------|--------------|-----------------|------------|------------|------------|--------------|
|              |          |              | Kot sultan      | Hafiz abad | Shah jamal | Jaman shah | Kharal azeem |
| September    | 25       | Max As (ppb) | 260             | 200        | 380        | 290        | 400          |
|              |          | Min As (ppb) | 130             | 80         | 140        | 160        | 170          |
|              |          | Average      | 195             | 140        | 260        | 225        | 285          |
| October      | 15       | Max As (ppb) | 350             | 290        | 190        | 350        | 250          |
|              |          | Min As (ppb) | 150             | 120        | 50         | 150        | 130          |
|              |          | Average      | 250             | 205        | 120        | 250        | 190          |
| November     | 10       | Max As (ppb) | 370             | 400        | 300        | 290        | 190          |
|              |          | Min As (ppb) | 180             | 180        | 120        | 160        | 80           |
|              |          | Average      | 275             | 290        | 210        | 225        | 135          |

**Table S9:** Team members involved in survey and project

| <b>Sr. No.</b> | <b>Name of Survey Team</b> | <b>Designation/Responsibilities</b>        |
|----------------|----------------------------|--------------------------------------------|
| 1              | Dr. Ejaz Hussain           | Project administration/supervision         |
| 2              | Meryam Sultana             | Research student, Sampling/field assistant |
| 3              | Muhammad Zeeshan Abid      | Research student, Results Interpretation   |
| 4              | Aqsa Khan Buzdar           | Research student/Field Assistant           |
| 5              | Muhammad Jalil             | Research student/Driver                    |
| 6              | Prof. Dr. Abdul Rauf       | Instrumental access                        |
| 7              | Dr. Khezina Rafiq          | Field coordinator/administrator            |

**Table S10:** Persons that were hired from areas of survey.

| <b>Sr. No.</b> | <b>Name of Volunteers</b> | <b>Volunteer participation/services</b>                                         |
|----------------|---------------------------|---------------------------------------------------------------------------------|
| 1              | Muhammad Zeeshan          | Contributed as local guide/translator for public counseling in native languages |
| 2              | Muhammad Arbaz            | Volunteer serve tea and breakfast                                               |
| 3              | Farhan Ali                | Volunteer serve as jockey person/entertainment/songs for survey team            |
| 4              | Sobia Ramzan              | She voluntarily serves with traditional lassi                                   |

**Note:** All authors thanks and acknowledges the volunteers services. Services of these members were voluntarily contributed on the basis of their own wishes'

## Reference:

1. D. D. La, J. M. Patwari, L. A. Jones, F. Antolasic and S. V. Bhosale, Fabrication of a GNP/Fe–Mg binary oxide composite for effective removal of arsenic from aqueous solution, *ACS omega*, 2017, **2**, 218-226.
2. B. C. J. Mary, J. J. Vijaya, M. Bououdina, L. J. Kennedy, L. Khezami and A. Modwi, Adsorption ability of aqueous lead (II) by NiFe<sub>2</sub>O<sub>4</sub> and 2D-rGO decorated NiFe<sub>2</sub>O<sub>4</sub> nanocomposite, *Journal of Materials Science: Materials in Electronics*, 2023, **34**, 845.
3. L. R. Liu RuiJiang, S. X. Shen XiangQian, L. H. Li HongXia, Z. X. Zhang XiNai and W. L. Wang LiWei, Performances of methyl blue and arsenic (V) adsorption from aqueous solution onto magnetic 0.8 Ni<sub>0.5</sub>Zn<sub>0.5</sub>Fe<sub>2</sub>O<sub>4</sub>/0.2 SiO<sub>2</sub> nanocomposites, 2014.
4. L.-K. Wu, H. Wu, Z.-Z. Liu, H.-Z. Cao, G.-Y. Hou, Y.-P. Tang and G.-Q. Zheng, Highly porous copper ferrite foam: A promising adsorbent for efficient removal of As (III) and As (V) from water, *Journal of Hazardous Materials*, 2018, **347**, 15-24.
5. L.-K. Wu, H. Wu, H.-B. Zhang, H.-Z. Cao, G.-Y. Hou, Y.-P. Tang and G.-Q. Zheng, Graphene oxide/CuFe<sub>2</sub>O<sub>4</sub> foam as an efficient adsorbent for arsenic removal from water, *Chemical Engineering Journal*, 2018, **334**, 1808-1819.
6. A. Giri, E. Kirkpatrick, P. Moongkhamklang, S. Majetich and V. Harris, Photomagnetism and structure in cobalt ferrite nanoparticles, *Applied physics letters*, 2002, **80**, 2341-2343.
7. G. Zhang, Z. Ren, X. Zhang and J. Chen, Nanostructured iron (III)-copper (II) binary oxide: a novel adsorbent for enhanced arsenic removal from aqueous solutions, *Water Research*, 2013, **47**, 4022-4031.
8. J. Zhu, Z. Lou, Y. Liu, R. Fu, S. A. Baig and X. Xu, Adsorption behavior and removal mechanism of arsenic on graphene modified by iron–manganese binary oxide (FeMnO<sub>x</sub>/RGO) from aqueous solutions, 2015.
9. D. D. La, T. A. Nguyen, L. A. Jones and S. V. Bhosale, Graphene-Supported Novel Adsorbents for Spinel Arsenic CuFe Removal 2 Composites: in Aqueous Media, *Fluorescent Probes and Sensors*, 2018, **17**, 219.
10. W. Tang, Y. Su, Q. Li, S. Gao and J. K. Shang, Superparamagnetic magnesium ferrite nanoadsorbent for effective arsenic (III, V) removal and easy magnetic separation, *Water research*, 2013, **47**, 3624-3634.
11. W.-H. Xu, L. Wang, J. Wang, G.-P. Sheng, J.-H. Liu, H.-Q. Yu and X.-J. Huang, Superparamagnetic mesoporous ferrite nanocrystal clusters for efficient removal of arsenite from water, *CrystEngComm*, 2013, **15**, 7895-7903.
12. S. S. Hassan, A. H. Kamel, A. A. Hassan, A. E.-G. E. Amr, H. Abd El-Naby, M. A. Al-Omar and A. Y. Sayed, CuFe<sub>2</sub>O<sub>4</sub>/polyaniline (PANI) nanocomposite for the hazard mercuric ion removal: synthesis, characterization, and adsorption properties study, *Molecules*, 2020, **25**, 2721.
13. S. Zhang, H. Niu, Y. Cai, X. Zhao and Y. Shi, Arsenite and arsenate adsorption on coprecipitated bimetal oxide magnetic nanomaterials: MnFe<sub>2</sub>O<sub>4</sub> and CoFe<sub>2</sub>O<sub>4</sub>, *Chemical engineering journal*, 2010, **158**, 599-607.
